# Supplementary material for: Difunctionalized pillar[5]arene-based polymer nanosheets for photodynamic therapy of Staphylococcus aureus infection
Source: Royal Society of Chemistry journal article supplement (doi:10.1039/d0tb02786c), 2021-01-01
Supplement: d0tb02786c1.pdf [file d0tb02786c1.pdf]

# Difunctionalized Pillar[5]arene-Based Polymer Nanosheets for Photodynamic Therapy of Staphylococcus aureus Infection

*Fei Li<sup>1</sup>, Mingsong Zang<sup>1</sup>, Shengda Liu<sup>1</sup>, Xiumei Li<sup>1</sup>, Xiaojia Jiang<sup>1</sup>, Ruizhen Tian<sup>1</sup>, Quan Luo<sup>1</sup>, Chunxi Hou<sup>1</sup>, Jiayun Xu<sup>1,2\*</sup>, Junqiu Liu<sup>1,2\*</sup>*

1.State Key Laboratory of Supramolecular Structure and Materials, College of Chemistry, Jilin University, Changchun 130012, People's Republic of China. E-mail: junqiuliu@jlu.edu.cn.

2.College of Material, Chemistry and Chemical Engineering, Hangzhou Normal University, Hangzhou, China

E-mail: junqiuliu@jlu.edu.cn; xujiayun@jlu.edu.cn

## Contents

1. Materials and measurements
2. Fig.S1.  $^1\text{H}$ -NMR spectrum of 1,4-bis(bromoethoxy)copillar[5]arene
3. Fig.S2. MALDI-TOF spectrum of 1,4-bis(bromoethoxy)copillar[5]arene
4. Fig.S3.  $^1\text{H}$ -NMR spectrum of TPyP-Zn
5. Fig.S4. MALDI-TOF spectrum of TPyP-Zn
6. Fig.S5.  $^1\text{H}$ -NMR spectrum of TMEEAI
7. Fig.S6. FTIR spectrum measurements
8. Fig.S7.  $\zeta$ -Potential experiments
9. Fig.S8. The stability of the material in PBS solution
10. Fig.S9. The stability of the material in serum

**Materials and Measurements.** All the solvents used in the experiments were obtained from Beijing chemical plant. 1,4-Bis-(2-bromo-ethoxy)-benzene, 1,4-dimethoxybenzene, paraformaldehyde boron trifluoride etherate, 5,10,15,20-tetra(4-pyridyl)porphyrin and zinc acetate were purchased from Energy Chemical. DCFH-DA and glutaraldehyde, 2.5% (EM Grade) were purchased from Beijing Solarbio Science & Technology Co., Ltd. (Beijing, China). Dulbecco's modified essential medium (DMEM), fetal bovine serum (FBS) and penicillin-streptomycin solution were obtained from Sangon Biotech (Shanghai) Co., Ltd. The white light used in the experiments was from commercial OPPL LED bulb lamp. <sup>1</sup>H NMR spectra were recorded with a Bruker AVANCE III 500 instrument using a tetramethylsilane (TMS) proton signal as the internal standard. MALDI-TOF tests were performed at the Bruker Autoflex speed TOF/TOF. ζ-potential measurements were conducted with Malvern Instrument Zetasizer Nano ZS90 instrument) at 25 °C. Scanning electron microscopy (SEM) images were captured with a JEOL JSM 6700 F instrument. Transmission electron microscopy (TEM) images were captured with a JEM-2100 F instrument. Atomic force microscopy (AFM) images were captured with a Bruker Dimension Fast Scan Atomic Force Microscopy instrument in tapping mode. UV-vis absorption spectra were performed on a Shimadzu 3100 UV-vis spectrophotometer. Fourier transform infrared (FTIR) spectra were recorded on a Bruker VERTEX 80 V. Fluorescence spectra were recorded on a Shimadzu 5301PC. EPR measurements were conducted on a JEOL JES-FA 200 instrument. CLSM characterization was performed on a ZEISS LSM 710 apparatus. The absorbance for MTT assay analysis was measured on a microplate reader (DeTie HBS-

1096B) at the wavelength of 490 nm.

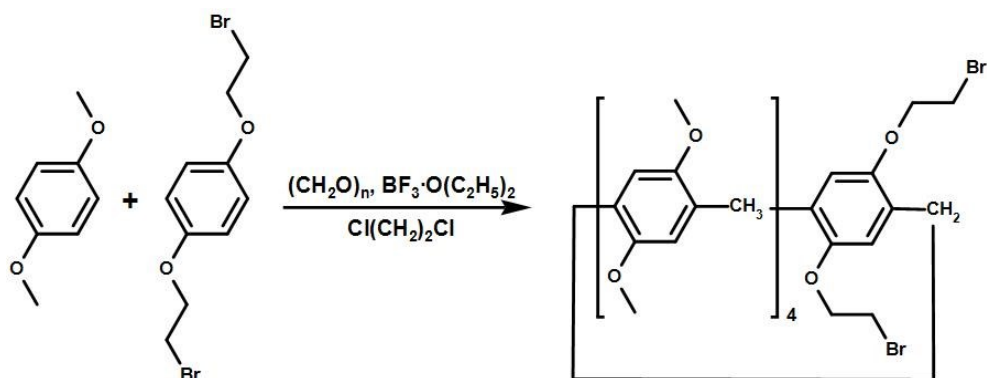

**Scheme S1.** Synthesis route of 1,4-bis(bromoethoxy)copillar[5]arene.

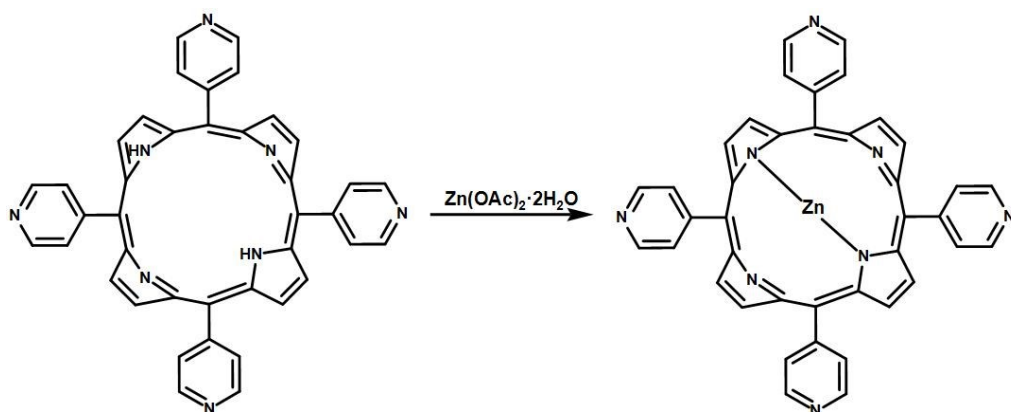

**Scheme S2.** Synthesis route of TPyP-Zn.

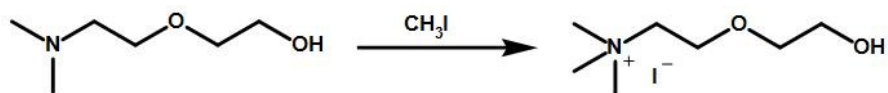

**Scheme S3.** Synthesis route of 2-(2-hydroxyethoxy)-N,N,N-trimethylethanaminium iodide.

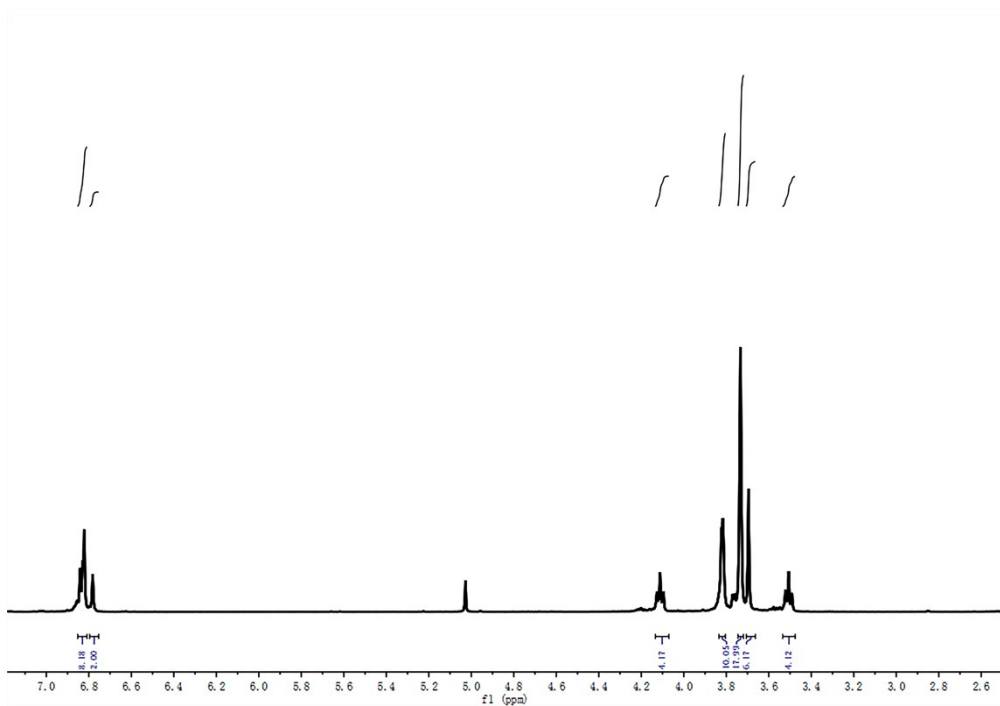

**Fig.S1** <sup>1</sup>H-NMR spectrum of 1,4-bis(bromoethoxy)copillar[5]arene. <sup>1</sup>H-NMR (500 MHz, CDCl<sub>3</sub>, 25 °C, TMS): δ (ppm): 6.82 (t, 8H), 6.78 (s, 2H), 4.11 (t, 4H), 3.82 (s, 10H), 3.73 (s, 18H), 3.69 (s, 6H), 3.51 (t, 4H).

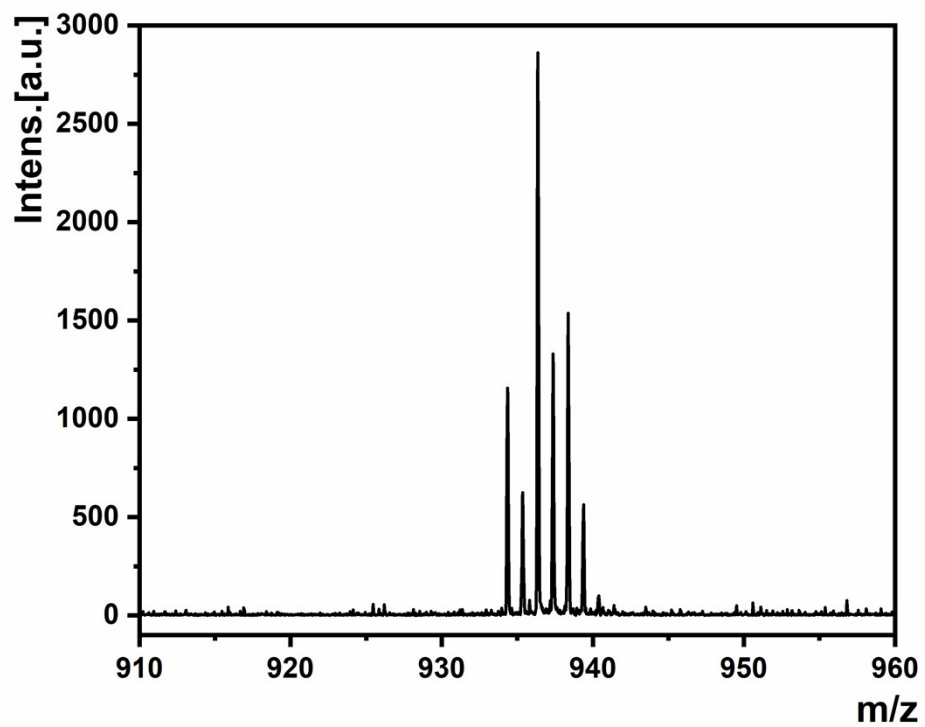

**Fig.S2** MALDI-TOF spectrum of 1,4-bis(bromoethoxy)copillar[5]arene. MS (Maldi-Tof): m/z: 936.36.

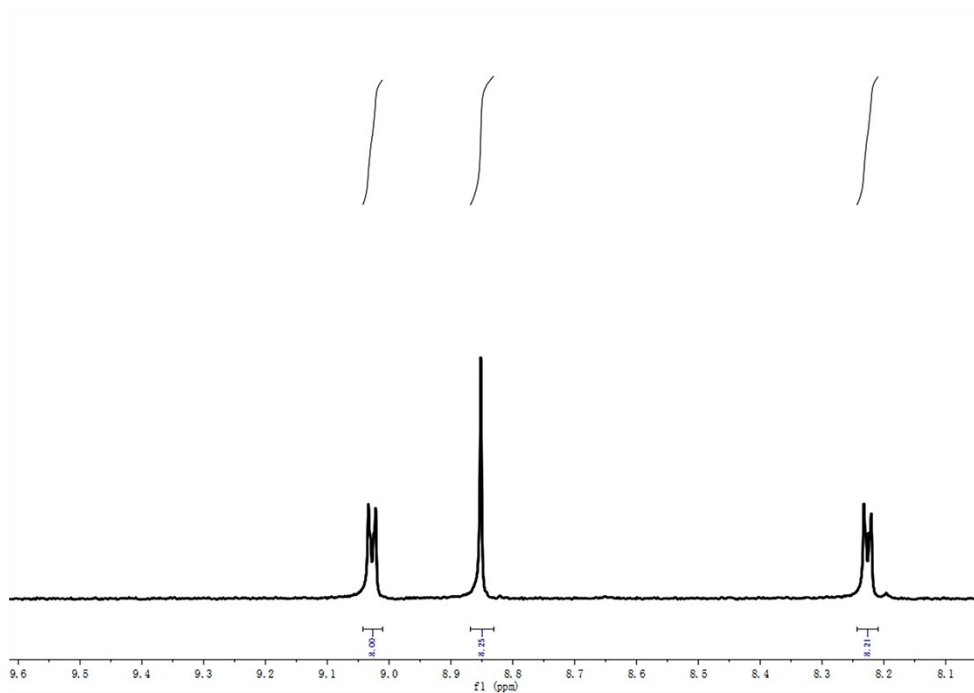

**Fig.S3** <sup>1</sup>H-NMR spectrum of TPyP-Zn. <sup>1</sup>H-NMR (500 MHz, *d*<sub>6</sub>-DMSO, 25 °C, TMS): δ (ppm): 9.01 (d, 8H), 8.85 (s, 8H), 8.23 (d, 8H).

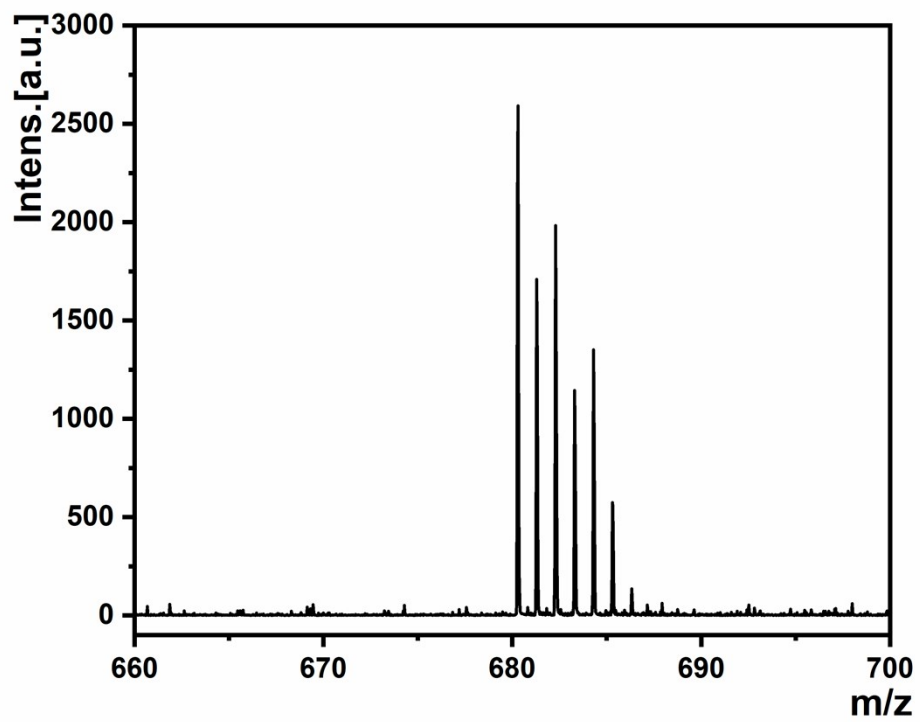

**Fig.S4** MALDI-TOF spectrum of TPyP-Zn. MS (Maldi-Tof): m/z: 680.29.



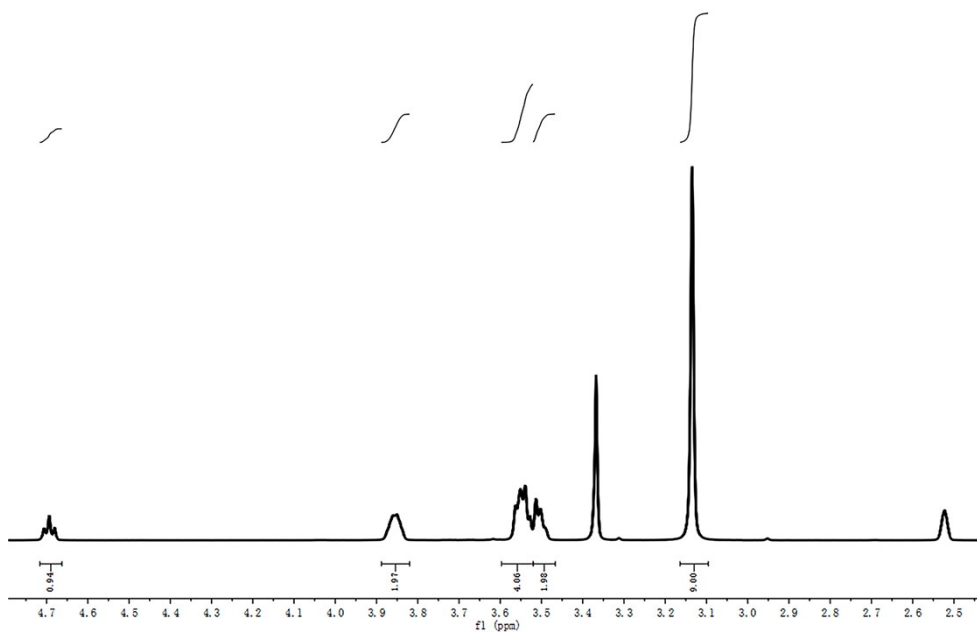

**Fig.S5**  $^1\text{H-NMR}$  spectrum of 2-(2-hydroxyethoxy)-N,N,N-trimethylethanaminium iodide.  $^1\text{H-NMR}$  (500 MHz,  $d_6$ -DMSO, 25  $^\circ\text{C}$ , TMS):  $\delta$  (ppm): 4.69 (t, 1H), 3.85 (t, 2H), 3.55 (m, 4H), 3.51 (t, 2H), 3.13 (s, 9H).

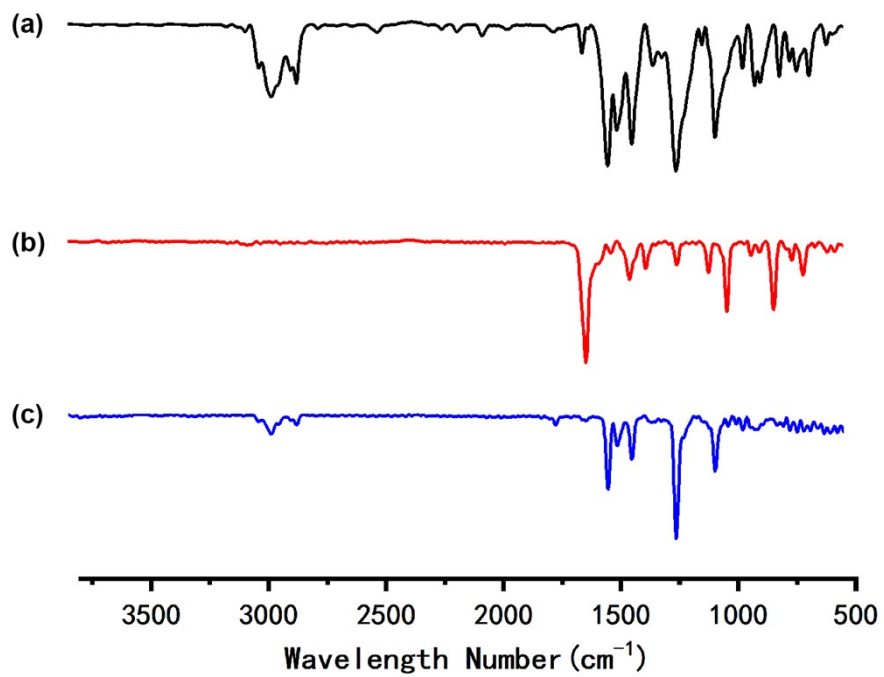

**Fig.S6** FTIR spectrum of a) BMCP5; b) TPyP-Zn; c) purified polymer nanosheets.

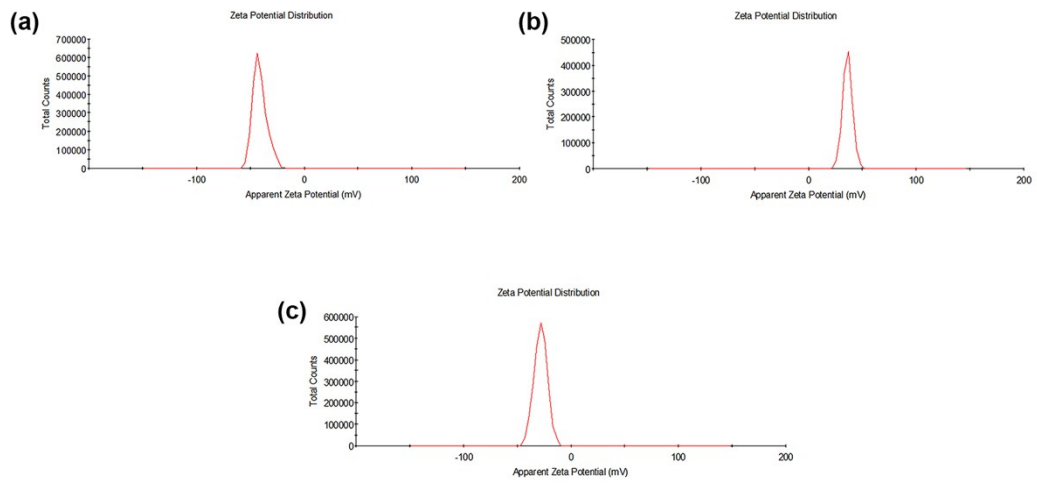

**Fig.S7**  $\zeta$ -Potential of a) *MRSA* (-41.2 mV); b) purified polymer nanosheets (+36.2 mV); c) *MRSA*-nanosheets complex (-28.4 mV).

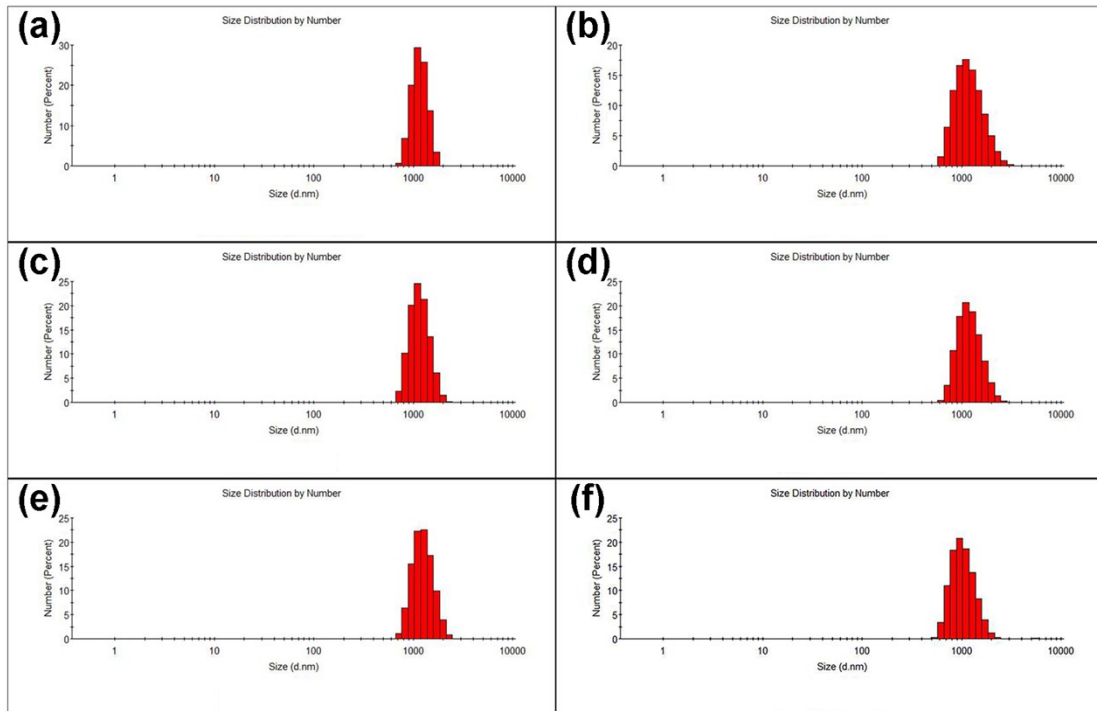

**Fig.S8** Hydrodynamic sizes of the nanosheets in PBS measured by DLS. (a), (b), (c), (d), (e), and (f) represent the nanosheets which have stayed for 0, 3, 6, 9, 12 and 24 h.

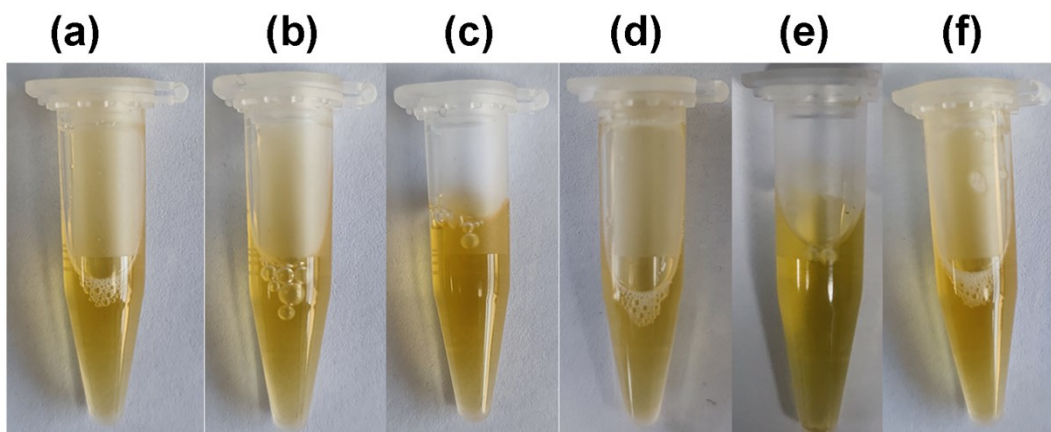

**Fig.S9** Pictures of nanosheets in 50% serum at different intervals. (a), (b), (c), (d), (e), and (f) represent the nanosheets which have stayed for 0, 3, 6, 9, 12 and 24 h.
